# Supplementary material
Source: PubMed Central journal article supplement (PMC2048702)
Supplement: plntcell_tpc.107.051870_1.pdf [file plntcell_tpc.107.051870_1.pdf]

## SUPPLEMENTAL MATERIAL (Pierre *et al.*)

### *Content*

#### SUPPLEMENTAL FIGURES 1-4

**Supp Fig. 1. T-DNA insertion in line *nmt1-1* causes *BAR:AtNMT1* transcriptional fusions and At *NMT1* overexpression.**

**Supp Fig. 2. Transgenes used in this study.**

**Supp Fig. 3. Sensitization of Arabidopsis seedlings to EtOH vapor.**

**Supp Fig. 4. The phylogenetic tree of NMT sequences suggests that there are three main NMT families**

#### SUPPLEMENTAL METHODS

**I- Transgene constructs cloning strategies**

**II- Shuffled Sc *NMT* sequence**

**III- List of oligonucleotide primers used in this study**

*a- Oligonucleotides used for cloning*

*b- Oligonucleotides used for RT- or real time PCR*

*c- Oligonucleotides used for AKIN $\beta$ :GFP fusions*

**SupFig. 1: T-DNA insertion in line *nmt1-1* causes *BAR:AtNMT1* transcriptional fusions and *At NMT1* overexpression**

**Panel A:** RT-PCR analysis of NMT1 transcript levels in the WT (N/N), *nmt1-1* (n/n) and NMT1/*nmt1-1* heterozygous (N/n) backgrounds. The details of the quantitative radioactive analysis have been described elsewhere (Ross et al., 2005). A value of 1 was assigned to *At NMT1* expression in the WT.

**Panel B:** RNA blots were analyzed as previously described (Giglione et al., 2000). We obtained mRNA from plants with a homozygous WT (N/N) or a heterozygous *NMT1/nmt1-1* background (N/n). The labeled DNA probes used corresponded to the full-length *NMT1* gene, *BAR* and the left border. The transcripts corresponding to *BAR* (0.5 kb), *NMT1* (1.6 kb) and the newly formed *BAR:AtNMT1* fusion mRNA (2.9 kb) were detected. The mRNA size ladder marker is shown on the left.

**Panel C:** Map of the intergenic region and the two mRNAs produced from the 35S promoter driving the *BAR* gene in the T-DNA.

**References:**

**Giglione, C., Serero, A., Pierre, M., Boisson, B., and Meinel, T.** (2000). Identification of eukaryotic peptide deformylases reveals universality of N-terminal protein processing mechanisms. *EMBO J.* **19**, 5916-5929.

**Ross, S., Giglione, C., Pierre, M., Espagne, C., and Meinel, T.** (2005). Functional and developmental impact of cytosolic protein N-terminal methionine excision in *Arabidopsis*. *Plant Physiol.* **137**, 623-637.

**A**

N/N    N/n    n/n    Control  
(no mRNA)

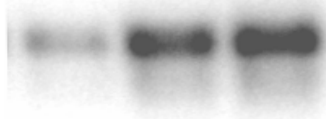

|                  |   |   |    |   |
|------------------|---|---|----|---|
| Signal intensity | 1 | 8 | 16 | 0 |
|------------------|---|---|----|---|

**B****DNA probe**

NMT1

BAR

LB

N/N

N/n

N/N

N/n

N/N

N/n

*NMT1:BAR* →*NMT1* →*BAR* →

← 2.7 kb

← 1.5 kb

← 0.6 kb

**C***NMT1::T-DNA* insertion in line *nmt1-1*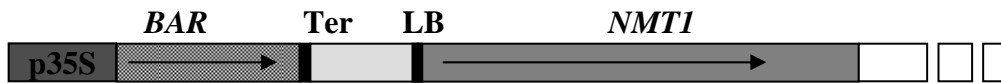

Stop codons

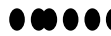↑  
ATG

(14)●

mRNAs  
expressed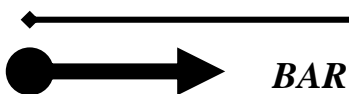*NMT1:BAR***SupFig.1**

**SupFig. 2: Transgenes used in this study**

**Panel A:** Map of the five types of transgene used to induce the expression of NMTs in various backgrounds. The full-length ORF of each orthologous NMT was expressed under control of the *At NMT1* promoter. Each construct contains (i) the 5' untranslated exon (E1), (ii) the first intron (I1) and (iii) the final 3' untranslated region of *At NMT1*.

**Panel B:** Map of a supplementary transgene used to induce NMT2 overproduction in various backgrounds. The full-length ORF of *At NMT2* was expressed under the control of the 35S promoter (*P35S*).

**Panel C:** Schematic diagram of the inducible NMT1 transgenic construct introduced into the *nmt1-1* line to yield the F11 line. The complete ORF of *At NMT1* was placed under the control of the *alcA* promoter (*PAlcA*). The 35S terminator (*t35S*) was used. Transcription factor *AlcR* is expressed under the control of the 35S promoter and the *Nos* terminator (*tNos*). In this construct, *At NMT1* expression is induced in the presence of EtOH vapor or watering.

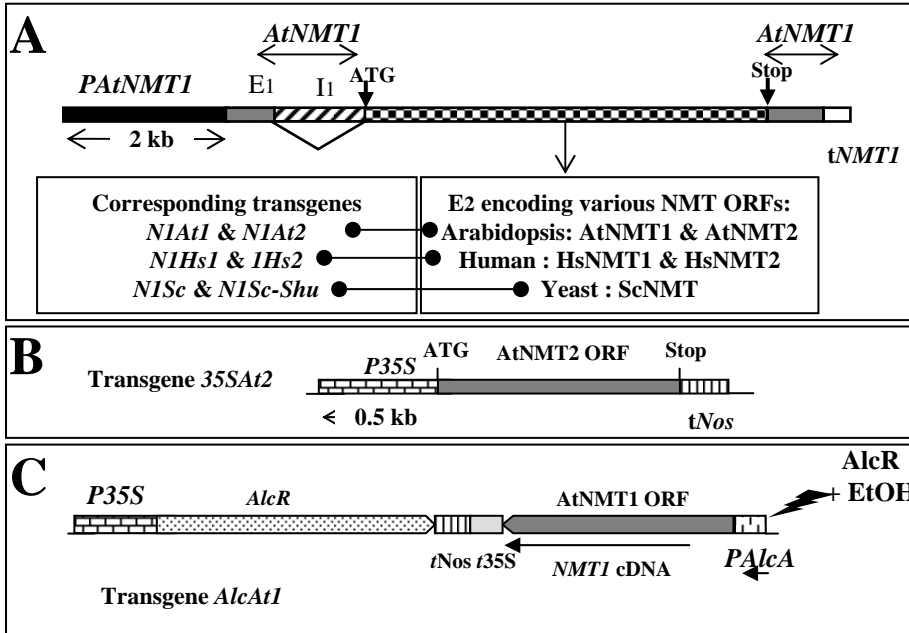

SupFig.2

**SupFig. 3: Sensitization of *Arabidopsis* seedlings to EtOH vapor**

The glass cylinder was left open at the top to allow the air to circulate. EtOH was placed in the 1.5 ml Eppendorf tube for the times indicated in **Fig. 5** or throughout the entire life of the plant.

**Glass cylinders** **Opening to ambient air**

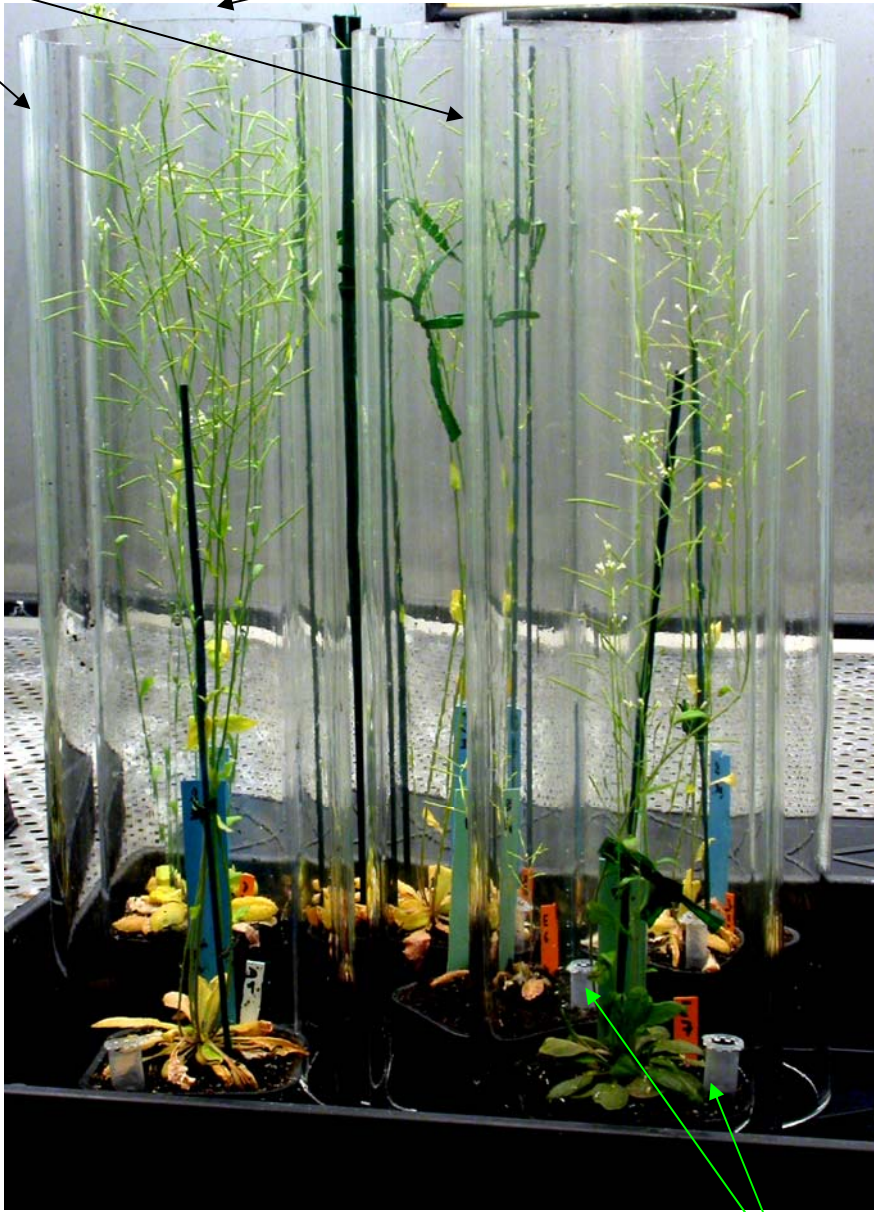

**Eppendorff tubes filled with EtOH**

**SupFig.3**

**SupFig. 4: The phylogenetic tree of NMT sequences suggests that there are three main NMT families**

58 NMT sequences were selected as representative of sequence diversity. The sequences were extracted from completely sequenced genomes or from genomes for which sequencing is almost complete. These sequences were aligned with Clustal X (Jeanmougin et al., 1998) as shown below, manually adjusted to optimize alignment and the bootstrap tree constructed with PHYLIP. The random number generator seed was 111 and the number of bootstrap trials was 1000. The rooted phylogenetic tree was constructed with N-J Tree (Jeanmougin et al., 1998) and drawn with TreeView1.65 (<http://taxonomy.zoology.gla.ac.uk/rod/treeview.html>; see Page, 1996). Internal values labeled on each node record the stability of the branch over the 1000 bootstrap replicates. The three main NMT types and classes are clustered and shown in color.

**References:**

**Jeanmougin, F., Thompson, J.D., Gouy, M., Higgins, D.G., and Gibson, T.J.** (1998).

Multiple sequence alignment with Clustal X. *Trends Biochem. Sci.* **23**, 403-405.

**Page, R.D.M.** (1996). TREEVIEW: An application to display phylogenetic trees on personal computers. *Comput. Appl. Biosci.* **12**, 357-358.



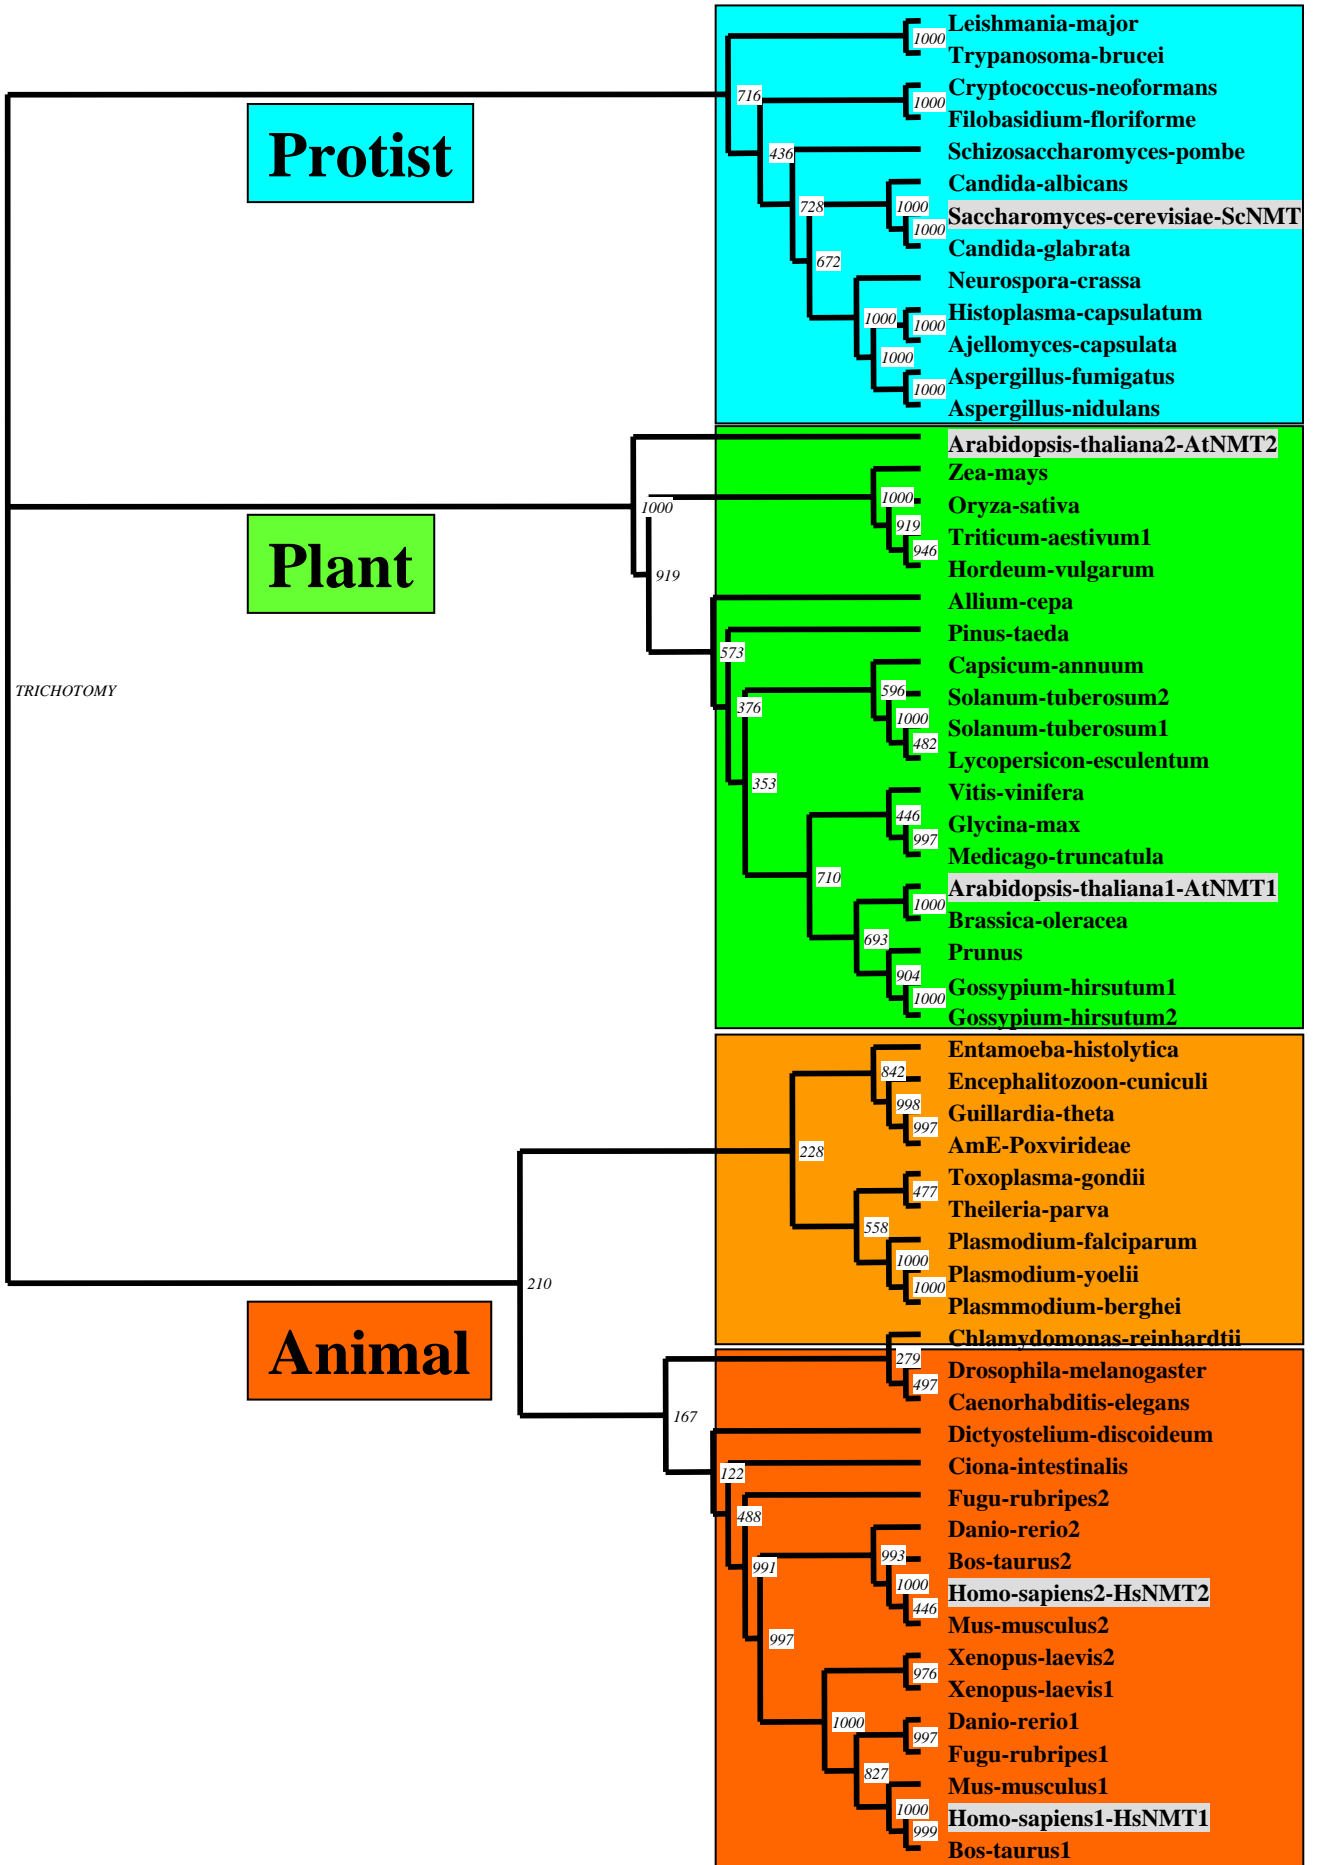

Plasmodium-yoelii -----  
Plasmodium-berghei -----  
Plasmodium-falciparum -----  
Xenopus-laevis2 -----  
Xenopus-laevis1 -MADQSETAAG-----DRLEEDENGHGHCSDCENEKHSNNR---GFG  
Danio-erio1 -MADENETAP-----LPEKEEVEEEDHGHCSCNCEYEEHSSD---GEK  
Fugu-rubripes1 -----  
Homo-sapiens1-HsNMT1 -MADESETAVKPPAPPLPQMMEGNGNGHEHCSDCENEEDNSYNRGGLSPA  
Bos-taurus1 -MGDESETAVKPPAPPLPQMMEGNGNGHEHCSDCENEEDNSYNRGGLSPA  
Mus-musculus1 -MADESETAVKLPAPSLPLMMEGNGNGHEHCSDCENEEDNSHNRSGLSA  
Homo-sapiens2-HsNMT2 -MAEDSESAAS-----QQSLELDDQDTCGIDGDNEEETEHAAG--SPG  
Mus-musculus2 -MAEDSESAAS-----QQSLELDDQDTCGIDGDNEEETEHAAG--SPG  
Bos-taurus2 -MAEDSESAAS-----QQSLELDDQDTCGIDGDNEEETEHAAG--SPG  
Danio-erio2 -MAEDSESAAS-----QQSLELDDQDTCGIDGDNEEENEHMOC--SPG  
Fugu-rubripes2 -----  
Ciona-intestinalis --MEESNG-----IEEVVEVVVRVGAKEAQEKTEES-  
Drosophila-melanogaster -MPNENAEDLS-----GQELKQKAKEVADASEAMLEKVVAG-----  
Dictyostelium-discoideum -----  
Saccharomyces-cerevisiae-ScNMT -MSEE-----DK-----  
Candida-glabrata -MSE-----  
Candida-albicans -MSGD-----NTGNKS-----  
Histoplasma-capsulatum -MSEQEGNQSE-----HQSEHVGESEGLPNETPTTSQSTNA  
Ajellomyces-capsulata -MSEQEGNQSE-----HQSEHVGESEGLPNETPTTSQSTNA  
Aspergillus-fumigatus -MSD-----SK--DRKGKAP-----  
Aspergillus-nidulans -MSD-----SK--DSKGKAP-----  
Neurospora-crassa -----  
Schizosaccharomyces-pombe -MDNE-----NNKNTK-----  
Cryptococcus-neoformans -MDSS-----DNK-----  
Filobasidium-floriforme -MDSS-----DNK-----  
Solanum-tuberosum1 -MADD-----SKAAENH-----  
Solanum-tuberosum2 -MADN-----SKSTENH-----  
Lycopersicon-esculentum --ADD-----SKAAENH-----  
Arabidopsis-thaliana1-AtNMT1 --ADN-----NSPPGSV-----  
Brassica-oleracea -MGDE-----NSLAGSL-----  
Glycina-max -MVDS-----NPSSGSP-----  
Medicago-truncatula -MVDS-----NPSSGSP-----  
Vitis-vinifera -----  
Gossypium-hirsutum1 -MTDG-----NPPPGSP-----  
Gossypium-hirsutum2 -MTDG-----NPPPGSP-----  
Prunus -----  
Triticum-aestivum1 -MAAP-----NNDPAA-----  
Hordeum-vulgarum --APN-----NNDAAAS-----  
Oryza-sativa MAAPN-----NNDAAAG-----  
Zea-mays MAAPN-----SNDAAAS-----  
Allium-cepa --MDL-----NPTSSTS-----  
Arabidopsis-thaliana2-AtNMT2 --SDP-----KLKPVED-----  
Capsicum-annuum -----  
Pinus-taeda -----  
Chlamydomonas-reinhardtii -----  
Leishmania-major -----  
Trypanosoma-brucei -----  
Entamoeba-histolytica -----  
Caenorhabditis-elegans -MSHG-----HSHDGAPCG-----  
Toxoplasma-gondii -----  
Theileria-parva -MSEIPHNT-----SLNHDKDHISSSKAREPEED-----  
Encephalitozoon-cuniculi -----  
Guillardia-theta -----  
AmE-Poxviridae -----

Plasmodium-yoelii -----  
Plasmodium-berghei -----  
Plasmodium-falciparum -----  
Xenopus-laevis2 -----  
Xenopus-laevis1 DESGGKKKKKQKRKKE---KSGGDALEAAEAP-----  
Danio-erio1 GDTGAKKKKKKQKKN---KDSGAKDAAQDPL-AK-----  
Fugu-rubripes1 -----  
Homo-sapiens1-HsNMT1 NDTGAKKKKKKQK---KEKGETSDSAQDQPVK-----  
Bos-taurus1 NDTGAKKKKKKQK---KEKGETSDSAQDQPVK-----  
Mus-musculus1 NDTGAKKKKKKQK---KEKGSMESTQDQPVK-----  
Homo-sapiens2-HsNMT2 GYLGAKKKKKKQKRKKEKPNSSGGTKSDSASDSQEIKIQQPS  
Mus-musculus2 GDLGAKKKKKKQKRKKEKPNSSGGTKSDSASDSQEIKIQQSSKHNAIWQI  
Bos-taurus2 GDLGAKKKKKKQKRKKEKPNSSGGTKSDSASDSQEIKIQQPS  
Danio-erio2 GDLGAKKKKKKQKRKKEKPNSSGGTKSDSASDSQEIK-----  
Fugu-rubripes2 -----  
Ciona-intestinalis -----ENKMKKKKKK-----TKEVSPEEK-D-----

Drosophila-melanogaster --LNIQDTASTNAAG---NEDAEQPDGAKN-----  
Dictyostelium-discoideum -----  
Saccharomyces-cerevisiae-ScNMT -----A-----  
Candida-glabrata -----  
Candida-albicans -----NSAP--S-----  
Histoplasma-capsulatum STGTAGKGEKKSSDGPAAANPATKLTSPMAESLLELNPALR-----  
Ajellomyces-capsulata STGTAGKGEKKSSDGPAAANPATKLTSPMAESLLELNPALR-----  
Aspergillus-fumigatus -----EGQSSEKKGAVN---ITPQMAESLLELNPALR-----  
Aspergillus-nidulans -----QPNDAEQTPGGK---LTPQAAEALLENPPLK-----  
Neurospora-crassa -----  
Schizosaccharomyces-pombe -----NSQDSS-----  
Cryptococcus-neoformans -----AATD-----  
Filobasidium-floriforme -----AATD-----  
Solanum-tuberosum1 -----NLTSDSN-----  
Solanum-tuberosum2 -----NQSSDDN-----  
Lycopersicon-esculentum -----NLTSDSN-----  
Arabidopsis-thaliana1-AtNMT1 -----EQKADQI-----  
Brassica-oleracea -----EEKADQV-----  
Glycina-max -----EETQPNP-----  
Medicago-truncatula -----EETQPNP-----  
Vitis-vinifera -----  
Gossypium-hirsutum1 -----KENPDPN-----  
Gossypium-hirsutum2 -----KENPDPN-----  
Prunus -----  
Triticum-aestivum1 -----ASASAST-----  
Hordeum-vulgarum -----ASASAST-----  
Oryza-sativa -----ASASATT-----  
Zea-mays -----ASGTGPA-----  
Allium-cepa -----QSESE-----  
Arabidopsis-thaliana2-AtNMT2 -----ALVTYAK-----  
Capsicum-annuum -----  
Pinus-taeda -----  
Chlamydomonas-reinhardtii -----AQAKD-----  
Leishmania-major -----  
Trypanosoma-brucei -----  
Entamoeba-histolytica -----  
Caenorhabditis-elegans -----GHHGDDGAGGSRPS-----  
Toxoplasma-gondii -----  
Theileria-parva -----LPEKLTNLKLSVNTN-----  
Encephalitozoon-cuniculi -----  
Guillardia-theta -----  
AmE-Poxviridae -----

Plasmodium-yoelii -----MDGDNQKEVSRDIYQII-----  
Plasmodium-berghei -----QKEISRDIYQII-----  
Plasmodium-falciparum -----MNDKDFVGRDLYQLI-----  
Xenopus-laevis2 -----  
Xenopus-laevis1 ANTLPAERIQEIQKAIELFSVQG-GPA-----  
Danio-erio1 VNSLPADKLQEIQKAIELFSVQG-GPA-----  
Fugu-rubripes1 -----  
Homo-sapiens1-HsNMT1 -----MNSLPAERIQEIQKAIELFSVQG-GPA-----  
Bos-taurus1 -----MNSLPAERIQEIQKAIELFSVQG-GPA-----  
Mus-musculus1 -----MTSLPAERIQEIQKAIELFSVQG-GPA-----  
Homo-sapiens2-HsNMT2 -----KNPSVPMQKLQDIQRAMELLSACQ-GPA-----  
Mus-musculus2 SAGAAMGGDTMEGEWIDL RMYHKNPTIP IQKLQDIQRAMELLSACQ-GPA-----  
Bos-taurus2 -----KNSTIPVQKLQDIQRAMELLSACQ-GPA-----  
Danio-erio2 -----NPAIPMQLQDIQRAMELLSTCQ-GPA-----  
Fugu-rubripes2 -----EKKQEQIQRALHLFSLQG-GLP-----  
Ciona-intestinalis -----SFMKVVQSALAAFEHET-S-----  
Drosophila-melanogaster -----EASVSANASKQALLQAVS-DAM-----  
Dictyostelium-discoideum -----MGLVELFKAS-----  
Saccharomyces-cerevisiae-ScNMT -----KLENLLKLLQLN--NDD-----  
Candida-glabrata -----KKIEELFEASEHE--QWG-----  
Candida-albicans -----KIEELKLLAMG-----  
Histoplasma-capsulatum -----SELAGMKEKATEALRQMNISD--LLT-----  
Ajellomyces-capsulata -----SELAGMKEKATEALRQMNISD--LLT-----  
Aspergillus-fumigatus -----NETAGMKDKKAAEAMRKMNIAB--LLT-----  
Aspergillus-nidulans -----NELGGLDKDKALEALRKMNIAB--LLT-----  
Neurospora-crassa -----MEAFKLLIQD--IIT-----  
Schizosaccharomyces-pombe -----FSE-----GGIRELLDRLALR--SLI-----  
Cryptococcus-neoformans -----EIRRALKAADLMK--ILD-----  
Filobasidium-floriforme -----EIRRALKAADLMK--ILD-----  
Solanum-tuberosum1 -----LSSE--SGNEVSID--SLT-----  
Solanum-tuberosum2 -----LAPE--NGNEVAID--SLA-----  
Lycopersicon-esculentum -----LSSE--SGNEVSID--SLA-----

|                                |                                                     |                                |                                                       |
|--------------------------------|-----------------------------------------------------|--------------------------------|-------------------------------------------------------|
| Arabidopsis-thaliana1-AtNMT1   | -----VEANPLVKDDTSLE--TIV                            | Chlamydomonas-reinhardtii      | -----RYAFWETQPVVAQFTEGSEPV--SRDGPIDKPKT               |
| Brassica-oleracea              | -----AEATPLVGDASLE--TIV                             | Leishmania-major               | -----AAHAFWSTQPVVPT--EDTEKIVFAGPMDEPKT                |
| Glycine-max                    | -----PDGNAPVSDLALE--NLA                             | Trypanosoma-brucei             | ---DKA-F-----TEHQFWSQTPVRQPGADKVGFI--MES--S           |
| Medicago-truncatula            | -----PDGNAPAESDLALD--NLA                            | Entamoeba-histolytica          | -----                                                 |
| Vitis-vinifera                 | -----                                               | Caenorhabditis-elegans         | -----                                                 |
| Gossypium-hirsutum1            | -----PEANPFSNDDSSLE--SIV                            | Toxoplasma-gondii              | -----                                                 |
| Gossypium-hirsutum2            | -----PEANPFSNDDSSLE--SIV                            | Theileria-parva                | -----SYIPEHKFWDTQVLTKLTDVNSN--EG-GIDPNED              |
| Prunus                         | -----                                               | Encephalitozoon-cuniculi       | ---MG-----KIKHKFWSTQPVDRNGEAMP-----S---               |
| Triticum-aestivum1             | -----SDAALAAPEDTSIE--ALA                            | Guillardia-theta               | -----                                                 |
| Hordeum-vulgarum               | -----SDGAPAAPEDTSIE--ALA                            | AmE-Poxviridae                 | -----MSYWINKSICKLNYSIDN--IINTIEP---                   |
| Oryza-sativa                   | -----SEP--APEDTSIE--ALA                             |                                |                                                       |
| Zea-mays                       | -----GE-----EDISIE--ALA                             |                                |                                                       |
| Allium-cepa                    | -----SID--ALA                                       |                                |                                                       |
| Arabidopsis-thaliana2-AtNMT2   | -----SSQIQLAKDDTSGG--TIV                            | Plasmodium-yoelii              | VENVRKDEYKL-PEGYVWYVCDVNDENRKE--VYNLLTDNYVE-DDDNI     |
| Capsicum-annuum                | -----                                               | Plasmodium-berghei             | VENVRK--YKL-PEGYAWYVCDVNDENRKE--VYNLLTDNYVE-DDDNI     |
| Pinus-taeda                    | -----MGPSK--VLA                                     | Plasmodium-falciparum          | VEDVRKDEYKL-PSGYAWCVCDITKENRSD--IYNLLTDNYVE-DDDNI     |
| Chlamydomonas-reinhardtii      | -----                                               | Xenopus-laevis2                | ---DNIRQEPYSL--PQGFMDTLDLSNAEVLKE--LYTLLNENYVE-DDDNI  |
| Leishmania-major               | -----MS                                             | Xenopus-laevis1                | ---DNIRQEPYSL--PQGFMDTLDLSNAEVLKE--LYTLLNENYVE-DDDNI  |
| Trypanosoma-brucei             | -----MT                                             | Danio-erio1                    | ---DNIREEPYSL--PQGFMDTLDLSNAEVLKE--LYTLLNENYVE-DDDNI  |
| Entamoeba-histolytica          | -----                                               | Fugu-rubripes1                 | ---DSIREEPYSL--PQGFMDTLDLSNAEVLKE--LYTLLNENYVE-DDDNI  |
| Caenorhabditis-elegans         | -----VNDVQALVDQLRLAGVDVS                            | Homo-sapiens1-HsNMT1           | ---DNIRQEPYSL--PQGFMDTLDLSNAEVLKE--LYTLLNENYVE-DDDNI  |
| Toxoplasma-gondii              | -----MRVS----                                       | Bos-taurus1                    | ---DNIRQEPYSL--PQGFMDTLDLSNAEVLKE--LYTLLNENYVE-DDDNI  |
| Theileria-parva                | -----SDPTPNSTTSSSIRARIF                             | Mus-musculus1                  | ---DNIRQEPYSL--PQGFMDTLDLSNAEVLKE--LYTLLNENYVE-DDDNI  |
| Encephalitozoon-cuniculi       | -----                                               | Homo-sapiens2-HsNMT2           | ---DNVRQEPYSL--PQGFMDTLDLSNAEVLKE--LYTLLNENYVE-DDDNI  |
| Guillardia-theta               | -----                                               | Mus-musculus2                  | ---DNIRQEPYSL--PQGFMDTLDLSNAEVLKE--LYTLLNENYVE-DDDNI  |
| AmE-Poxviridae                 | -----                                               | Bos-taurus2                    | ---ENVRQEPYSL--PQGFMDTLDLSNAEVLKE--LYTLLNENYVE-DDDNI  |
|                                |                                                     | Danio-erio2                    | ---ENIRQEPYSL--PQGFMDTLDLSNAEVLKE--LYTLLNENYVE-DDDNI  |
|                                |                                                     | Fugu-rubripes2                 | ---GSVRTDPYSL--PEGFRMDNLELSSQTVLRE--LCTLLSENYLE-EDDNT |
|                                |                                                     | Ciona-intestinalis             | ---DNVREEPYSL--PPDFEWDTVNLENTKELEE--VYKLLNENYVE-DDDNI |
|                                |                                                     | Drosophila-melanogaster        | ISEIRALPYTL-PGGFKVTLTDLNANDLKE--LYTLLNENYVE-DDDNI     |
|                                |                                                     | Dictyostelium-discoideum       | LDDVRKDPPLT-PPAFEWITDLCNPKPEELKE--IYLLTYHNYVE-DDDNI   |
|                                |                                                     | Saccharomyces-cerevisiae-ScNMT | PEDISDKPLPL-LSSFEMCSDIVDNKQLED--VYLLNENYVE-DRDAG      |
|                                |                                                     | Candida-glabrata               | PADIPDEPLPL-LPDFEWCAIDVDEKQLED--VYLLNENYVE-DRDAS      |
|                                |                                                     | Candida-albicans               | PEDVPNDPLPL-ISDFEWSTLDIDNQLQDE--LYKLLYDNYVE-DIDAT     |
|                                |                                                     | Histoplasma-capsulatum         | LQVRSREPIPL-VDFGEWVTLTLDIDDEADVKE--FYELLANHYVE-DGSGM  |
|                                |                                                     | Ajellomyces-capsulata          | LQVRSREPIPL-VDFGEWVTLTLDIDDEADVKE--FYELLANHYVE-DGSGM  |
|                                |                                                     | Aspergillus-fumigatus          | PEKVSKEPDAL-LEGFEWATLDTNETELQE--LWDLTYHYVE-DDNAM      |
|                                |                                                     | Aspergillus-nidulans           | PEKVSKEPDAL-LEGFEWATLDTNETELQE--LWDLTYHYVE-DDNAM      |
|                                |                                                     | Neurospora-crassa              | VEDIPDEPIPLNLAFRFRVMTDLTDEKMQE--VEKLLYGHFVE-DDNAM     |
|                                |                                                     | Schizosaccharomyces-pombe      | INQVPREPYRL-LKEFEWATIDVTNDNELSE--VHELLTENYVE-DATAM    |
|                                |                                                     | Cryptococcus-neoformans        | PADVQKQEPYSL-PAGFEWSTIDINDEEQSKE--VYVLLCENYVE-DDDAM   |
|                                |                                                     | Filobasidium-floriforme        | PADVQKQEPYSL-PAGFEWSTIDINDEEQSKE--VYVLLCENYVE-DDDAM   |
|                                |                                                     | Solanum-tuberosum1             | LTEVKQEPYSL-PSPYEWTTCDDLSEDMCSE--VYLLTNNYVE-DDENM     |
|                                |                                                     | Solanum-tuberosum2             | LSEVKQEPYSL-PSQYEWTTCCDMSEEMCNE--VYVLLTNNYVE-DDENM    |
|                                |                                                     | Lycopersicon-esculentum        | LTEVKQEPYSL-PSPYEWTTCDDLSEDMCNE--VYVLLTNNYVE-DDENM    |
|                                |                                                     | Arabidopsis-thaliana1-AtNMT1   | LSEVKQEPYSL-PSVYEWTTCCDMSEDMCSE--VYVLLKNNYVE-DDENM    |
|                                |                                                     | Brassica-oleracea              | LSEVKQEPYSL-PAAYEWTTCCMKSDDYVCE--VYVLLKNNYVE-DDENM    |
|                                |                                                     | Glycine-max                    | LSEVKQEPYSL-PDHYEWVTCIDINSEETCDE--VYVLLAHNYVE-DDENM   |
|                                |                                                     | Medicago-truncatula            | LSEVKQEPYSL-PNLYEWVTCIDINSEETCDE--IYVLLAHNYVE-DDENM   |
|                                |                                                     | Vitis-vinifera                 | -----                                                 |
|                                |                                                     | Gossypium-hirsutum1            | LSEVKQEPYSL-PSPYEWTTCDDMSEETCNE--VYVLLKNNYVE-DDENM    |
|                                |                                                     | Gossypium-hirsutum2            | -----                                                 |
|                                |                                                     | Prunus                         | -----CTE--VYVLLKNNYVE-DDENM                           |
|                                |                                                     | Triticum-aestivum1             | LSEVRADPYPL-PAAFEWFTCDLDD-----LYALLAHNYVE-DDENM       |
|                                |                                                     | Hordeum-vulgarum               | LSEVRADPYPL-PAAFEWFTCDLDD-----LYALLAHNYVE-DDENM       |
|                                |                                                     | Oryza-sativa                   | LSEVRADPYPL-PAAFEWFTCDLDDDDALLTD--LYALLAHNYVE-DDENM   |
|                                |                                                     | Zea-mays                       | LSEVRAEPYPL-PAAFEWLTCDDLDDALLAD--LYSLLAHNYVE-DDENM    |
|                                |                                                     | Allium-cepa                    | LSEVKADPYNL-PLAYEWTTCDMLDDTTCLLE--VYVLLTNNYVE-DDDNI   |
|                                |                                                     | Arabidopsis-thaliana2-AtNMT2   | VSEVKQEPYSL-LGQFEWTTCDMLSEDMCCLLE--MYNFKLEN--S-DDDQDQ |
|                                |                                                     | Capsicum-annuum                | -----                                                 |
|                                |                                                     | Pinus-taeda                    | -----                                                 |
|                                |                                                     | Chlamydomonas-reinhardtii      | LSEVRQEPYSL-PSHYEWTCIDINKDETSIE--IYNLLTNN-----        |
|                                |                                                     | Leishmania-major               | VQDVRQEPYSL-P--FEWCVDLTDVAHEVQVYELLSNNYVE-DDDAM       |
|                                |                                                     | Trypanosoma-brucei             | VADIPDEPIPI-ASTFEWTTPNMEAADIIHA--IYELLRNHYVE-DDDNI    |
|                                |                                                     | Entamoeba-histolytica          | LDAVPAEPYSL-PSTFEWSPDVANPEDLRG--VHELLRNHYVE-DSESM     |
|                                |                                                     | Caenorhabditis-elegans         | -----EYCIWNLDNEKEMEE--VYILLKENVYKEDDDAT               |
|                                |                                                     | Toxoplasma-gondii              | LDKVRAEPYSL-PAGFRNSVNDLSDEEQLNE--LYNLLTNNYVE-DDDSM    |
|                                |                                                     | Theileria-parva                | ---FXNEPYKL-PDGFVWCEDVDRPEELKE--VYDLSQHYVE-DDDNL      |
|                                |                                                     | Encephalitozoon-cuniculi       | VSRVKKNP IPL-PNGFEWISLDINDEEDRQ--VYKLLSENHYVE-DGDAL   |
|                                |                                                     | Guillardia-theta               | KHTISIEQPKL-PDGFREFDLGCVBELAN-----FLEKNYVE-DIYSG      |
|                                |                                                     | AmE-Poxviridae                 | ---MKSNIKISTKIFPPELEIFCHKIKERYPIHN--IQKFLNQNYIE-DIISS |
|                                |                                                     |                                | -----HKPYNN--NYCKDNFNKVLDDENLIDLYSYLYKNY--N-----      |
| Plasmodium-yoelii              | KNARDKIK-----IDYKFWYTPQVPKINEEFSES--INEPFIADNK      | Plasmodium-berghei             | KNARDKIK-----IDYKFWYTPQVPKINEEFSES--INEPFIADNK        |
| Plasmodium-falciparum          | RNAKDKIK-----IDYKFWYTPQVPKINEEFSES--VNEPFIADNK      | Plasmodium-falciparum          | RNAKDKIK-----IDYKFWYTPQVPKINEEFSES--VNEPFIADNK        |
| Xenopus-laevis2                | -----R-----KYQFWDTPQVPKINEEITC---HGP IEPDK          | Xenopus-laevis1                | -----R-----KYQFWDTPQVPKINEEITC---HGP IEPDK            |
| Xenopus-laevis1                | KTMEEASKR-----SYQFWDTPQVPKINEEITC---HGP IEPDK       | Danio-erio1                    | KTMEEASKR-----SYQFWDTPQVPKINEEITC---HGP IEPDK         |
| Fugu-rubripes1                 | ---MEEATRR-----SYQFWDTPQVPKINEEITC---HGP IEPDK      | Fugu-rubripes1                 | ---MEEATRR-----SYQFWDTPQVPKINEEITC---HGP IEPDK        |
| Homo-sapiens1-HsNMT1           | KTMEEASKR-----SYQFWDTPQVPKINEEITC---HGP IEPDK       | Homo-sapiens1-HsNMT1           | KTMEEASKR-----SYQFWDTPQVPKINEEITC---HGP IEPDK         |
| Bos-taurus1                    | KTMEEASKR-----SYQFWDTPQVPKINEEITC---HGP IEPDK       | Bos-taurus1                    | KTMEEASKR-----SYQFWDTPQVPKINEEITC---HGP IEPDK         |
| Mus-musculus1                  | KTMEEASKR-----SYQFWDTPQVPKINEEITC---HGP IEPDK       | Mus-musculus1                  | KTMEEASKR-----SYQFWDTPQVPKINEEITC---HGP IEPDK         |
| Homo-sapiens2-HsNMT2           | RNIDEAAKH-----RYQFWDTPQVPKINEEITC---HGAIEPDK        | Homo-sapiens2-HsNMT2           | RNIDEAAKH-----RYQFWDTPQVPKINEEITC---HGAIEPDK          |
| Mus-musculus2                  | RNIDEATKR-----RYQFWDTPQVPKINEEITC---HGAIEPDK        | Mus-musculus2                  | RNIDEATKR-----RYQFWDTPQVPKINEEITC---HGAIEPDK          |
| Bos-taurus2                    | RNIDEAAKH-----RYQFWDTPQVPKINEEITC---HGAIEADK        | Bos-taurus2                    | RNIDEAAKH-----RYQFWDTPQVPKINEEITC---HGAIEADK          |
| Danio-erio2                    | KNIDEATKH-----KYQFWDTPQVPKINEEITC---HGP IEPDK       | Danio-erio2                    | KNIDEATKH-----KYQFWDTPQVPKINEEITC---HGP IEPDK         |
| Fugu-rubripes2                 | RSLQAARNH-----KYHFWETQVVP--NDGVTM--HGP IIEADK       | Fugu-rubripes2                 | RSLQAARNH-----KYHFWETQVVP--NDGVTM--HGP IIEADK         |
| Ciona-intestinalis             | ---SLKEPASK-----PWKFWDTQVPKINEEITC---VGVIEADK       | Ciona-intestinalis             | ---SLKEPASK-----PWKFWDTQVPKINEEITC---VGVIEADK         |
| Drosophila-melanogaster        | ASTROMAK-----KFAFWSTQPVTKLDEQVTT--NECIEPNKE         | Drosophila-melanogaster        | ASTROMAK-----KFAFWSTQPVTKLDEQVTT--NECIEPNKE           |
| Dictyostelium-discoideum       | ---SLASKKPK-----GHEFWDTPQVPKINEEITC---SGPIENKT      | Dictyostelium-discoideum       | ---SLASKKPK-----GHEFWDTPQVPKINEEITC---SGPIENKT        |
| Saccharomyces-cerevisiae-ScNMT | TSKFTQEQK-----KAMKDKHKFWRTQPVKDFDEKVV--EEGIDKPKT    | Saccharomyces-cerevisiae-ScNMT | TSKFTQEQK-----KAMKDKHKFWRTQPVKDFDEKVV--EEGIDKPKT      |
| Candida-glabrata               | HAKLTANQR-----KEMKYEKFWKTPVTKFDEEVK--EEGPIHEEKT     | Candida-glabrata               | HAKLTANQR-----KEMKYEKFWKTPVTKFDEEVK--EEGPIHEEKT       |
| Candida-albicans               | ---QELSPAQQ-----KEMKDKHKFWRTQPVVSLSETVT--EEGIDKPKT  | Candida-albicans               | ---QELSPAQQ-----KEMKDKHKFWRTQPVVSLSETVT--EEGIDKPKT    |
| Histoplasma-capsulatum         | GLSVNPKNQ-----KDMASFKFWQTPVIRFDDRESE--PDGPIKIVE     | Histoplasma-capsulatum         | GLSVNPKNQ-----KDMASFKFWQTPVIRFDDRESE--PDGPIKIVE       |
| Ajellomyces-capsulata          | GLSVNPKNQ-----KDMASFKFWQTPVIRFDDRESE--PDGPIKIVE     | Ajellomyces-capsulata          | GLSVNPKNQ-----KDMASFKFWQTPVIRFDDRESE--PDGPIKIVE       |
| Aspergillus-fumigatus          | GLSVSGKNQ-----KDMASFKFWQTPVIRFDETST-D--TGGPIKIID    | Aspergillus-fumigatus          | GLSVSGKNQ-----KDMASFKFWQTPVIRFDETST-D--TGGPIKIID      |
| Aspergillus-nidulans           | GLSLTGKNK-----KDMAAFKFWQTPVIRFDEAASNA--AGGPKIMID    | Aspergillus-nidulans           | GLSLTGKNK-----KDMAAFKFWQTPVIRFDEAASNA--AGGPKIMID      |
| Neurospora-crassa              | GLASSGKNR-----KDMASYKFWATQVPVQFDEKPAIF--EEGPLKIQK   | Neurospora-crassa              | GLASSGKNR-----KDMASYKFWATQVPVQFDEKPAIF--EEGPLKIQK     |
| Schizosaccharomyces-pombe      | EKEEAAAPP-----KTYEDFKFWKTPQVPKDFDECT--QEGPIDPNTD    | Schizosaccharomyces-pombe      | EKEEAAAPP-----KTYEDFKFWKTPQVPKDFDECT--QEGPIDPNTD      |
| Cryptococcus-neoformans        | GKMALGNKSGT-----KNLGEHKFWKTPVQITGSGASAPMEEGPIDDPKT  | Cryptococcus-neoformans        | GKMALGNKSGT-----KNLGEHKFWKTPVQITGSGASAPMEEGPIDDPKT    |
| Filobasidium-floriforme        | GKMALGNKSGT-----KNLGEHKFWKTPVQITGSGASAPMEEGPIDDPKT  | Filobasidium-floriforme        | GKMALGNKSGT-----KNLGEHKFWKTPVQITGSGASAPMEEGPIDDPKT    |
| Solanum-tuberosum1             | RKLQESLSL-----PKRHKFWETQPVGQFKDLGDAS--LPEGPIEPPT    | Solanum-tuberosum1             | RKLQESLSL-----PKRHKFWETQPVGQFKDLGDAS--LPEGPIEPPT      |
| Solanum-tuberosum2             | RKQKESLPL-----AKKHKFWETQPVGQFKDLGDSS--LPEGPIEPPT    | Solanum-tuberosum2             | RKQKESLPL-----AKKHKFWETQPVGQFKDLGDSS--LPEGPIEPPT      |
| Lycopersicon-esculentum        | RKVQESLSL-----SKRHKFWETQPVGQFKDLGDSS--LPEGPIEPPT    | Lycopersicon-esculentum        | RKVQESLSL-----SKRHKFWETQPVGQFKDLGDSS--LPEGPIEPPT      |
| Arabidopsis-thaliana1-AtNMT1   | RRFQDSMSE-----AKTHKFWETQPVGQFKDIDGTS--LPEGPIEPATP   | Arabidopsis-thaliana1-AtNMT1   | RRFQDSMSE-----AKTHKFWETQPVGQFKDIDGTS--LPEGPIEPATP     |
| Brassica-oleracea              | RRFQDSMSV-----EKTHKFWETQPVGQFKDIDGTS--LPEGPIEAAPT   | Brassica-oleracea              | RRFQDSMSV-----EKTHKFWETQPVGQFKDIDGTS--LPEGPIEAAPT     |
| Glycine-max                    | QKVQESLSL-----BKRHKFWETQPVGQFKDIDGSS--LPEGPIELPIP   | Glycine-max                    | QKVQESLSL-----BKRHKFWETQPVGQFKDIDGSS--LPEGPIELPIP     |
| Medicago-truncatula            | QKVQESLSL-----DQRHKFWETQPVGQFKDIGNPT--LPEGPIEPPTP   | Medicago-truncatula            | QKVQESLSL-----DQRHKFWETQPVGQFKDIGNPT--LPEGPIEPPTP     |
| Vitis-vinifera                 | -----                                               | Vitis-vinifera                 | -----                                                 |
| Gossypium-hirsutum1            | RRFQDSMSS-----VKRHKFWETQPVGQFKDVGDT--LPGSIELPTP     | Gossypium-hirsutum1            | RRFQDSMSS-----VKRHKFWETQPVGQFKDVGDT--LPGSIELPTP       |
| Gossypium-hirsutum2            | RRFQDSMSS-----VKRHKFWETQPVGQFKDVGDT--LPGSIELPTP     | Gossypium-hirsutum2            | RRFQDSMSS-----VKRHKFWETQPVGQFKDVGDT--LPGSIELPTP       |
| Prunus                         | -----                                               | Prunus                         | -----                                                 |
| Triticum-aestivum1             | RRVQEHMTLANNP--TARRHKFWETQPVGQFKDVGADV--LPDGAIEPPSP | Triticum-aestivum1             | RRVQEHMTLANNP--TARRHKFWETQPVGQFKDVGADV--LPDGAIEPPSP   |
| Hordeum-vulgarum               | RRVQEHMTLASNP--TARRHKFWETQPVGQFKDVGADV--LPDGAIEPPSP | Hordeum-vulgarum               | RRVQEHMTLASNP--TARRHKFWETQPVGQFKDVGADV--LPDGAIEPPSP   |
| Oryza-sativa                   | RRVQEHMTLASNP--TARRHKFWETQPVGQFKDVGADV--LPDGAIEPPSP | Oryza-sativa                   | RRVQEHMTLASNP--TARRHKFWETQPVGQFKDVGADV--LPDGAIEPPSP   |
| Zea-mays                       | RRVQEHMTLSSNP--AARRHKFWETQPVGQFKDVGADV--LPDGAIEPPPT | Zea-mays                       | RRVQEHMTLSSNP--AARRHKFWETQPVGQFKDVGADV--LPDGAIEPPPT   |
| Allium-cepa                    | QKIQETLAVSSSQIQPVQHRFWETQPVQFKDLHNP--LPEGPIEPPTP    | Allium-cepa                    | QKIQETLAVSSSQIQPVQHRFWETQPVQFKDLHNP--LPEGPIEPPTP      |
| Arabidopsis-thaliana2-AtNMT2   | GRLLCQCY--KTHKFWETQPVQFKDIDGTS--LPEGPIEPATL         | Arabidopsis-thaliana2-AtNMT2   | GRLLCQCY--KTHKFWETQPVQFKDIDGTS--LPEGPIEPATL           |
| Capsicum-annuum                | -----                                               | Capsicum-annuum                | -----                                                 |
| Pinus-taeda                    | GRHRMLLSLG-----KHKFWETQPGQFKDVGQNH--LPEGPIEDPTP     | Pinus-taeda                    | GRHRMLLSLG-----KHKFWETQPGQFKDVGQNH--LPEGPIEDPTP       |







|                                |                                    |                      |                                |                                           |                |
|--------------------------------|------------------------------------|----------------------|--------------------------------|-------------------------------------------|----------------|
| Arabidopsis-thalianal-AtNMT1   | -----TSFQLQMNDAALIVSKQ-----        | -----KGFDFVFNALDVMHN | Chlamydomonas-reinhardtii      | -----LKFGMGDGO-LHYLYLNWRLGGG-HSLQPGD----- | VGL            |
| Brassica-oleracea              | -----TTFSSLMNDALIVAKQ-----         | -----KGFDFVFNALDVMHN | Leishmania-major               | RSFVBEQLKFGPGDGH-LRYFYFNWYAP----          | KLKPSQ-----VAL |
| Glycina-max                    | -----TPLLQMLMNDVLIIVAKQ-----       | -----KDFDFVFNALDVMHN | Trypanosoma-brucei             | GTYLKELKFGSPGDGN-LYYFYFNWYSP----          | SIPANE-----VGL |
| Medicago-truncatula            | -----TPLLQMLMNDALIVAKQ-----        | -----KDYDFVFNALDVMQN | Entamoeba-histolytica          | QQYLADLLFVPGDGY-LKYLYLNWACP----           | KVEPNK-----LAI |
| Vitis-vinifera                 | -----TPLLQMLMNDALIVAKQ-----        | -----KDYDFVFNALDVMQN | Caenorhabditis-elegans         | EKIFSDLKFGKGDGN-LQYYLYNWKCA----           | DMKPSQ-----IGL |
| Gossypium-hirsutum1            | -----TPLLQMLMNDALIVAKQ-----        | -----KEFDVFNALDVMHN  | Toxoplasma-gondii              | KSFVEDLKFGIGDGF-LRYLYNWRCP----            | EVGFFC-----LYI |
| Gossypium-hirsutum2            | -----TPLLQMLMNDALIVAKQ-----        | -----KDFDFVFNALDVMHN | Theileria-parva                | SLVFKDLKFGMGDGH-LHYMFNRYVP----            | DLKPSD-----VGI |
| Prunus                         | -----TPLLQMLMNDALIVAKT-----        | -----EDFDFVFNALDVMQN | Encephalitozoon-cuniculi       | SSFLARLGFVCGSGE-IRYLYNWKSE----            | EIPRDK-----VFF |
| Triticum-aestivum1             | -----TPLLQMLMNDALIVAKQ-----        | -----KNFDFVFNALDVMEN | Guillardia-theta               | KILRKIFNFKKSFGK-IRFCSHNLTIK----           | TSKNR-----VIGL |
| Hordeum-vulgarum               | -----TPLLQMLMNDALIVAKQ-----        | -----KNYDFVFNALDVMEN | AmE-Poxviridae                 | -----K-----LISYIYNYNFN-----               | NLSES-----I    |
| Oryza-sativa                   | -----TPLLQMLMNDALIVAKQ-----        | -----KNYDFVFNALDVMEN |                                |                                           |                |
| Zea-mays                       | -----TPLLQMLMNDALIVAKR-----        | -----NNYDFVFNALDVMEN |                                |                                           |                |
| Allium-cepa                    | -----TPLLQMLMNDALIVAK-----         |                      |                                |                                           |                |
| Arabidopsis-thaliana2-AtNMT2   | -----TSLSQLVNDALIVSKQ-----         | -----KGFDFVYASDVMQN  | Plasmodium-yoelii              |                                           | VLL---         |
| Capsicum-annuum                | -----TSLSQLVNDALIVSKQ-----         | -----FNALDVMHN       | Plasmodium-berghei             |                                           | VLL---         |
| Pinus-taeda                    | -----TPLLQMLMNDVLIIVAKK-----       | -----KDYDFVFNALDIMQN | Plasmodium-falciparum          |                                           | VLL---         |
| Chlamydomonas-reinhardtii      | -----TPLLQMLVNDAMAVAAA-----        | -----RGY-----D-----  | Xenopus-laevis2                |                                           | VL---          |
| Leishmania-major               | -----IPLHQLILDLLIVAH-----          | -----RGFDVCNMVEILDN  | Xenopus-laevis1                |                                           | VLQ---         |
| Trypanosoma-brucei             | -----VSIITQLVNDLLIIVKL-----        | -----NGFDVCNVVDIYDN  | Danio-erio1                    |                                           | VLQ---         |
| Entamoeba-histolytica          | -----VDFKQFPKDIILICAVQ-----        | -----NHCDVFNCLNISEN  | Fugu-rubripes1                 |                                           | VLQ---         |
| Caenorhabditis-elegans         | -----VTPKQLINDSLILANR-----         | -----EKFDVFNALDLMHN  | Homo-sapiens1-HsNMT1           |                                           | VLQ---         |
| Toxoplasma-gondii              | -----VPLKQLIEDALCLAKO-----         | -----LDFDFVFNALDVMEN | Bos-taurus1                    |                                           | VLQ---         |
| Theileria-parva                | -----MSFKSLMEHAIYFYSKS-----        | -----QGYDVYNALDLMEN  | Mus-musculus1                  |                                           | VLQ---         |
| Encephalitozoon-cuniculi       | -----VAEMVGLDMHFS-QV-----          | -----EGCDVFNCLDMMEN  | Homo-sapiens2-HsNMT2           |                                           | VLQ---         |
| Guillardia-theta               | -----FQLKKNFBEAKCFPKL-----         | -----LKIDIFFILHGKTN  | Mus-musculus2                  |                                           | VLQ---         |
| AmE-Poxviridae                 | -----IHKNYIPNNTIYEN-----           | -----YKCLKTIKLS-     | Bos-taurus2                    |                                           | VLQ---         |
|                                |                                    |                      | Danio-erio2                    |                                           | LLK---         |
|                                |                                    |                      | Fugu-rubripes2                 |                                           | YLF CAD        |
|                                |                                    |                      | Ciona-intestinalis             |                                           | VL----         |
|                                |                                    |                      | Drosophila-melanogaster        |                                           | ILM---         |
|                                |                                    |                      | Dictyostelium-discoidium       |                                           | VLL---         |
|                                |                                    |                      | Saccharomyces-cerevisiae-ScNMT |                                           | VML---         |
|                                |                                    |                      | Candida-glabrata               |                                           | VML---         |
|                                |                                    |                      | Candida-albicans               |                                           | VLL---         |
|                                |                                    |                      | Histoplasma-capsulatum         |                                           | ILV---         |
|                                |                                    |                      | Ajellomyces-capsulata          |                                           | ILV---         |
|                                |                                    |                      | Aspergillus-fumigatus          |                                           | VML---         |
|                                |                                    |                      | Aspergillus-nidulans           |                                           | VML---         |
|                                |                                    |                      | Neurospora-crassa              |                                           | VMV---         |
|                                |                                    |                      | Schizosaccharomyces-pombe      |                                           | VMI---         |
|                                |                                    |                      | Cryptococcus-neoformans        |                                           | VML---         |
|                                |                                    |                      | Filobasidium-floriforme        |                                           | VML---         |
|                                |                                    |                      | Solanum-tuberosum1             |                                           | VLL---         |
|                                |                                    |                      | Solanum-tuberosum2             |                                           | VLL---         |
|                                |                                    |                      | Lycopersicon-esculentum        |                                           | VLL---         |
|                                |                                    |                      | Arabidopsis-thalianal-AtNMT1   |                                           | VLL---         |
|                                |                                    |                      | Brassica-oleracea              |                                           | VLL---         |
|                                |                                    |                      | Glycina-max                    |                                           | VLL---         |
|                                |                                    |                      | Medicago-truncatula            |                                           | VLL---         |
|                                |                                    |                      | Vitis-vinifera                 |                                           | VLL---         |
|                                |                                    |                      | Gossypium-hirsutum1            |                                           | ELV---         |
|                                |                                    |                      | Gossypium-hirsutum2            |                                           | VLL---         |
|                                |                                    |                      | Prunus                         |                                           | -----          |
|                                |                                    |                      | Triticum-aestivum1             |                                           | VLL---         |
|                                |                                    |                      | Hordeum-vulgarum               |                                           | VLL---         |
|                                |                                    |                      | Oryza-sativa                   |                                           | VLL---         |
|                                |                                    |                      | Zea-mays                       |                                           | VLL---         |
|                                |                                    |                      | Allium-cepa                    |                                           | -----          |
|                                |                                    |                      | Arabidopsis-thaliana2-AtNMT2   |                                           | IL---          |
|                                |                                    |                      | Capsicum-annuum                |                                           | VLL---         |
|                                |                                    |                      | Pinus-taeda                    |                                           | VLL---         |
|                                |                                    |                      | Chlamydomonas-reinhardtii      |                                           | VLM---         |
|                                |                                    |                      | Leishmania-major               |                                           | VML---         |
|                                |                                    |                      | Trypanosoma-brucei             |                                           | VMV---         |
|                                |                                    |                      | Entamoeba-histolytica          |                                           | IL----         |
|                                |                                    |                      | Caenorhabditis-elegans         |                                           | VLQ---         |
|                                |                                    |                      | Toxoplasma-gondii              |                                           | SI----         |
|                                |                                    |                      | Theileria-parva                |                                           | VLL---         |
|                                |                                    |                      | Encephalitozoon-cuniculi       |                                           | VLP---         |
|                                |                                    |                      | Guillardia-theta               |                                           | MIF---         |
|                                |                                    |                      | AmE-Poxviridae                 |                                           | YLF---         |
| Plasmodium-yoelii              | KSVFADLKFGEGDGT-LKYLYNWKCA---      | SFDTSM-----VGI       |                                |                                           |                |
| Plasmodium-berghei             | KSVFADLKFGEGDGT-LKYLYNWKCA---      | SFDTSM-----VGI       |                                |                                           |                |
| Plasmodium-falciparum          | YSVFQDLKFGEGDGS-LKYLYNWKCA---      | SCHPSK-----IGI       |                                |                                           |                |
| Xenopus-laevis2                | KTFVEEGKVGIGDEN-LQYYLYNWKCP---     | SMGSEK-----VGL       |                                |                                           |                |
| Xenopus-laevis1                | KTFLEKLFKFGIGDGN-LQYYLYNWKCP---    | SMGAEK-----VGL       |                                |                                           |                |
| Danio-erio1                    | KTFLEKLFKFGIGDGN-LQYYLYNWKCP---    | SMGSEK-----VGL       |                                |                                           |                |
| Fugu-rubripes1                 | KTFLEKLFKFGIGDGN-LQYYLYNWKCP---    | SMGADK-----VGL       |                                |                                           |                |
| Homo-sapiens1-HsNMT1           | KTFLEKLFKFGIGDGN-LQYYLYNWKCP---    | SMGAEK-----VGL       |                                |                                           |                |
| Bos-taurus1                    | KTFLEKLFKFGIGDGN-LQYYLYNWKCP---    | SMGAEK-----VGL       |                                |                                           |                |
| Mus-musculus1                  | KTFLEKLFKFGIGDGN-LQYYLYNWKCP---    | SMGAEK-----VGL       |                                |                                           |                |
| Homo-sapiens2-HsNMT2           | KTFLEKLFKFGIGDGN-LQYYLYNWKCP---    | SMGAEK-----VGL       |                                |                                           |                |
| Mus-musculus2                  | KTFLEKLFKFGIGDGN-LQYYLYNWKCP---    | SMGAEK-----VGL       |                                |                                           |                |
| Bos-taurus2                    | KTFLEKLFKFGIGDGN-LQYYLYNWKCP---    | SMGAEK-----VGL       |                                |                                           |                |
| Danio-erio2                    | KTFLEKLFKFGIGDGN-LQYYLYNWKCP---    | SMGAEK-----VGL       |                                |                                           |                |
| Fugu-rubripes2                 | KAFLEPLKFRMGDVH-MQYYLYNWKCP---     | DITSNK-----VGF       |                                |                                           |                |
| Ciona-intestinalis             | SSFLKQLKFNVDVDS-LHYLYNWKCP---      | KISPSE-----VTL       |                                |                                           |                |
| Drosophila-melanogaster        | HVFLKDLKFGMGDGN-LHYLYNWKCP---      | DIPSEK-----VGL       |                                |                                           |                |
| Dictyostelium-discoidium       | KKYFAPLKFAGDGN-LQYYLYNWKCP---      | SMQPEE-----IAL       |                                |                                           |                |
| Saccharomyces-cerevisiae-ScNMT | STFFKDLKFAVGDDG-LQYYLYNYSPT---     | TKKSSE-----IGL       |                                |                                           |                |
| Candida-glabrata               | TLFLDLDLKFPGDGF-LNFYLPNRYRKPITGGI  | LNPDNSNDIKRRSN-VGV   |                                |                                           |                |
| Candida-albicans               | TLFLEDLKFPGDGF-LNFYLPNRYRFPITGGI   | EDQHPDTEHRSN-VGV     |                                |                                           |                |
| Histoplasma-capsulatum         | TYFLEKLFKFGDGF-LNYLYNRYRTPMDGGI    | DKKTKEVVEDQTSIGV     |                                |                                           |                |
| Ajellomyces-capsulata          | PLFLEQLKFGAGDGO-LHYLYNRYRTAPIAGGV  | NKDLNPKDERKRGV-VGV   |                                |                                           |                |
| Aspergillus-fumigatus          | PLFLEQLKFGAGDGO-LHYLYNRYRTAPIAGGV  | NKDLNPKDERKRGV-VGV   |                                |                                           |                |
| Aspergillus-nidulans           | PLFLEQLKFGAGDGO-LHFYLYNRYRTAPIAGGV | NKDLNPKDERKRMGG-VGI  |                                |                                           |                |
| Neurospora-crassa              | ALFLEKQKFGPGDGO-LHYLYNRYRKPITGGI   | QHSSTAKQGSK----      |                                |                                           |                |
| Schizosaccharomyces-pombe      | NMFLQEQKFGPGDGO-LNYLYNWNCAPIDGGQ   | HSTAKQGSK----        |                                |                                           |                |
| Cryptococcus-neoformans        | NMFLQEQKFGPGDGO-LNYLYNWNCAPIDGGQ   | HSTAKQGSK----        |                                |                                           |                |
| Filobasidium-floriforme        | ETFLKELKFGPGDGO-LHYLYNRYRIR---     | HVLRPSE-----LGL      |                                |                                           |                |
| Solanum-tuberosum1             | ETFLKELKFGPGDGO-LHYLYNRYRIR---     | HVLRPSE-----LGL      |                                |                                           |                |
| Solanum-tuberosum2             | ETFLKELKFGPGDGO-LHYLYNRYRIR---     | HVLRPSE-----LGL      |                                |                                           |                |
| Lycopersicon-esculentum        | DSFLKELKFGPGDGO-LHYLYNRYRIR---     | SALKPSE-----LGL      |                                |                                           |                |
| Arabidopsis-thalianal-AtNMT1   | ESFLKELKFGPGDGO-LHYLYNRYRIR---     | SALKPSE-----LGL      |                                |                                           |                |
| Brassica-oleracea              | ESFLKELKFGPGDGO-LHYLYNRYRIR---     | SALKPSE-----LGL      |                                |                                           |                |
| Glycina-max                    | ESFLKELKFGPGDGO-LHYLYNRYRIR---     | SALKPSE-----LGL      |                                |                                           |                |
| Medicago-truncatula            | ESFLKELKFGPGDGO-LHYLYNRYRIR---     | HALKPSG-----LGL      |                                |                                           |                |
| Vitis-vinifera                 | ESFLKELKFGPGDGO-LHYLYNRYRIR---     | NGLKPSG-----LGL      |                                |                                           |                |
| Gossypium-hirsutum1            | DAFVKELKFGPGDGS-LNYDLDNRYRIR---    | NLKPSE-----LGL       |                                |                                           |                |
| Gossypium-hirsutum2            | ESFLKELKFGPGDGO-PHYLYNRYRIR---     | NALRPSE-----LGL      |                                |                                           |                |
| Prunus                         | ESFL-----                          |                      |                                |                                           |                |
| Triticum-aestivum1             | EGFLKELKFGPGDGO-LHYLYNRYRIR---     | NGIKPSE-----LGL      |                                |                                           |                |
| Hordeum-vulgarum               | EGFLKELKFGPGDGO-LHYLYNRYRIR---     | NGIKPSE-----LGL      |                                |                                           |                |
| Oryza-sativa                   | ESFLKELKFGPGDGO-LHYLYNRYRIR---     | NGIKPSE-----LGL      |                                |                                           |                |
| Zea-mays                       | ESFLKELKFGPGDGO-LHYLYNRYRIR---     | NGIKPSE-----LGL      |                                |                                           |                |
| Allium-cepa                    | -----                              |                      |                                |                                           |                |
| Arabidopsis-thaliana2-AtNMT2   | ESFLKELRFYPLCRQ-SHYLYNRYRIR---     | NALKPSE-----LGL      |                                |                                           |                |
| Capsicum-annuum                | DSFLKELKFGPGDGO-LHYLYNRYRIR---     | HVLRPSE-----LGL      |                                |                                           |                |
| Pinus-taeda                    | ESFLKDLKFGPGDGO-LHYLYNRYRIR---     | DALKPSQ-----LGL      |                                |                                           |                |

# Supplemental methods

## I- Transgene constructs cloning strategies

### N1At1 (PNMT1:AtNMT1)

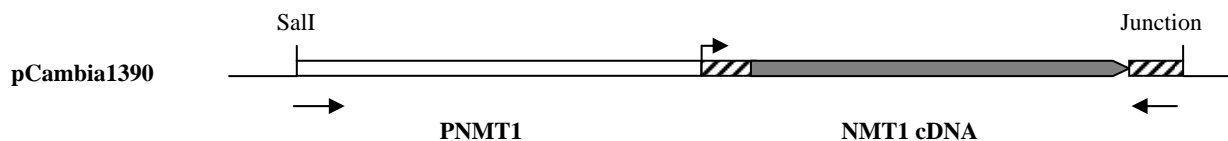

The *NMT1* gene (2090 bp for promoter and 1995 bp for cDNA) was amplified from genomic DNA with N5F9 and N5R4 primers and digested with SalI. The fragment was inserted into the binary vector pCambia1390 between the SalI and SmaI restriction sites.

### N1Hs1(PNMT:HsNMT1)

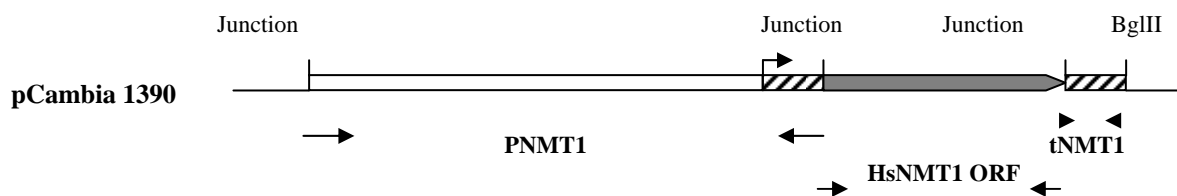

- The 3' end of *NMT1* gene was amplified from genomic DNA with N5F20 and N5R16 (BglII site) primers and cloned into SmaI and BglII sites of the binary vector pCambia1390.
- The promoter and the 5' non coding region of *AtNMT1* (2550bp) were amplified with PN1Xho (XhoI site) and N5R22 (StuI site) primers, digested by XhoI and cloned into SalI/EcoRV digested pBluescript II KS+ vector (Stratagene).
- *N1Hs* ORF was amplified from a cDNA clone with N1HF2 (DraI site) and N1HR2 (XmaI site) primers, digested and cloned into StuI / XmaI sites of the previous construct.
- The resulting construct was cloned after XhoI/SmaI digestion into SalI/SmaI sites of the binary vector containing the 3' non coding region of *AtNMT1*.

### N1Hs2 (PNMT1:HsNMT2)

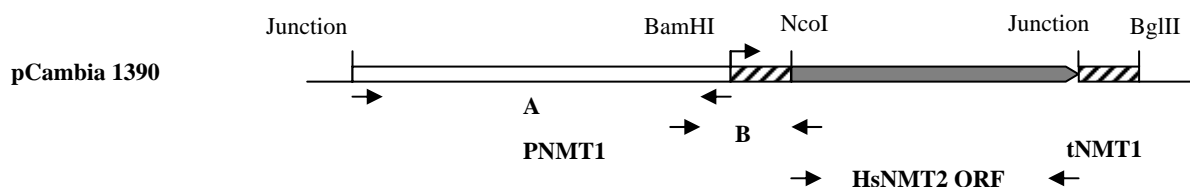

- *N2Hs* ORF was amplified from a cDNA clone with NHF2 (NcoI site) and NHR1 (EcoRI site) primers. The resulted fragment was cloned after EcoRI digestion into EcoRI / SmaI sites of pBluescript II KS+.
- The 5' *NMT1* non coding region (B) was amplified from genomic DNA with N5F14 (SacI site) and N5R15 (NcoI site) primers and cloned after digestion into NcoI / SacI sites of the previous vector containing the *N2Hs* ORF.
- The DNA fragment *N2Hs* ORF/ 5' end of *NMT1* was excised from pSK+ by EcoRI / BamHI digestions and inserted after filling in EcoRI site, into the modified binary vector pCambia 1390 containing the 3' non coding region of *AtNMT1* (N1Hs1 cloning).
- The *NMT1* promoter region (2080 bp) was amplified with PN1Xho (XhoI site) and N5R8 primers and cloned after XhoI/BamHI digestion into SalI/BamHI sites of the previous binary vector.



### 35SAt2 (P35S:NMT2)

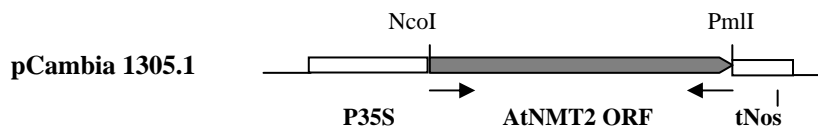

- The *NMT2* ORF was amplified from a cDNA clone with N2-Nco and N2R-Pml primers and digested with NcoI and PmlI. The resulting fragment was inserted into the binary vector pCambia 1305.1 after removal of the *Gus* gene by the same digestions.

### N1At2 (PNMT1:AtNMT2)

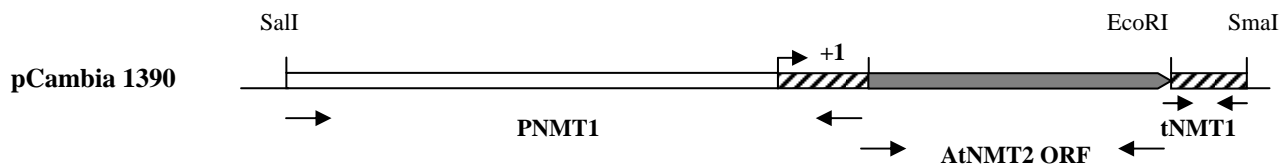

- The 3' end of *NMT1* gene was amplified from genomic DNA with N1-Eco and N1R-Xma primers; the resulting fragment was digested by EcoRI and cloned into EcoRI and SmaI sites of the binary vector pCambia 1390.
- The *NMT2* ORF was amplified from a cDNA clone with N2+1 and N2R-Eco primers and digested by EcoRI. The promoter and the 5' non-coding region of *NMT1* were amplified from genomic DNA using PN1-Xho and PN1R primers and digested by XhoI.
- The two fragments were ligated together first and the resulted construct was subcloned into pBluescript II KS+ (XhoI/EcoRI). The construct was finally cloned in the SalI/EcoRI sites of the previously modified binary vector.

### N1Sc (PNMT1:ScNMT)

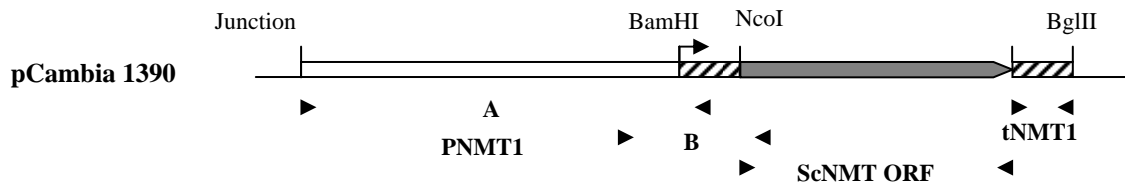

- The 3' end of *NMT1* gene was amplified from genomic DNA with N5F20 and N5R16 (BglIII site) primers and cloned into SmaI and BglIII sites of the binary vector pCambia 1390.
- Fragment A from *NMT1* promoter was amplified with PN1Xho (XhoI site) and N5R8 primers and cloned after XhoI/BamHI digestion into SalI / BamHI sites of the previous cloning vector.
- N1Sc coding region was amplified from a pQE60 expression vector (Boisson & Meinel 2003) derived from pBB331 with N1ScF1 (NcoI site) and N1ScR1 (SnaBI site) primers. The amplification product was inserted into a previous pBluescript II KS+ construct containing the 5' *NMT1* non coding region (B) and the ORF of *N2HS*. The *N2HS* gene was removed by NcoI/EcoRV digestion and replaced by *N1Sc*.
- The resulting pSK construct was digested by BamHI and SnaBI and cloned into BamHI/Sma sites of the pCambia construct containing the promoter and the 3' end of *NMT1*.

# N1Sc-Shu (*PNMT1*:*ScNMT-Shu*)

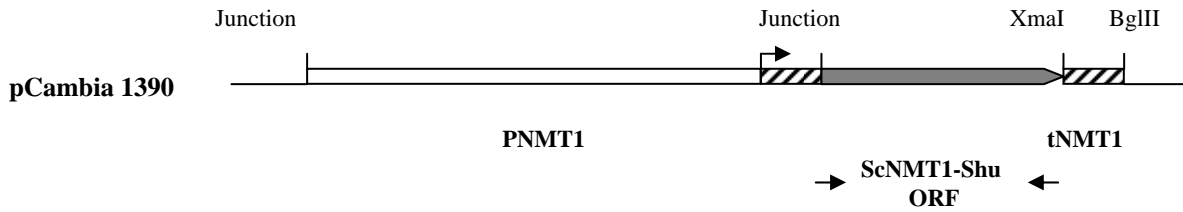

- N1Sc-Shu (see sequence in &II) was amplified from the pBluescript provided by US-Biological with N1ScF21 (DraI site) and N1ScR1 (XmaI site) primers and digested. The resulted fragment was inserted into a previous pBluescript II KS+ construct containing the N1Hs1. The *HsNMT1* ORF was removed by StuI / XmaI digestion and replaced by *N1Sc-Shu* ORF.
- The resulting construct was cloned after XhoI/SmaI digestion into Sall/SmaI sites of the modified binary vector pCambia 1390 containing the 3' non coding region of *AtNMT1* ( N1Hs1 cloning).

## II- Shuffled Sc *NMT* sequence (*ScNMT-Shu*)

a- Shuffled reverse translation of *ScNMT* ORF (456aa) to a 1365 base sequence of most likely codons obtained with *Arabidopsis thaliana* genetic code

>ScNMT/Res-At

```

ATGTCTGAAGAAGATAAGGCTAAGAAGCTTGAAAATCTTCTTAAGCTTCTTCAACTAATAATGATGATACTTCTAAGTTTACTCA
AGAACAAAAGAAGGCTATGAAGGATCATAAGTTTTGGAGAAGCTCAACCTGTTAAGGATTTTGATGAAAAGGTTGTTGAAGAAGG
ACCTATTGATAAGCCTAAGACTCCTGAAGATATTTCTGATAAGCCTCTTCTCTTCTTTTGAATGGTGTCTATTGATGTT
GATAATAAGAAGCAACTGAAGATGTTTTTGTCTTCTTAATGAAAATTATGTTGAAGATAGAGATGCTGGATTAGATTTAATTA
TACTAAGGAATTTTTAATTGGGCTCTTAAGTCTCCTGGATGGAAGAAGGATTGGCATATTGGAGTTAGAGTTAAGGAACTCAA
AAGCTTGTGCTTTTATTCTGCTATTCCTGTTACTCTTGAGGATTAGAGGAAAGCAAGTTCCTTCTGTTGAAAATTAATTTCTTTG
TTCATAAGCAACTTAGATCTAAGAGACTTACTCCTGTTCTTATTAAGGAAATTAAGTAGAAGGTTAATAAGTGTGATATTTGGCAT
GCTCTTTATACTGCTGGAATTGTTCTTCTGCTCTGTTTCTACTTGTAGATATACTCATAGACCTCTTAATTGGAAGAAGCTTTAT
GAAGTTGATTTTACTGGACTTCTGATGGACATACTGAAGAAGATATGATTGCTGAAAATGCTCTTCTGCTAAGACTAAGACTGC
TGGACTTAGAAAAGCTTAAGAAGGAAGATATTGATCAAGTTTTTGAACTTTTTAAGAGATATCAATCTAGATTTGAACCTTATC
TTTTACTAAGGAAGAATTTGAACATAATTTATTGGAGAAGAATCTCTTCTCTTGATAAGCAAGTTATTTTTCTTATGTGTTG
ACAACCTGATGGAAGATTACTGATTTTTTTCTTTTTATTCTTCTTTTACTATTCTTAATAATACTAAGTATAAGGATCTTGG
AATTGGATATCTTTATTATGCTACTGATGCTGATTTTCAATTTAAGGATAGATTTGATCCTAAGGCTACTAAGGCTCTTAAGAC
TAGACTTTTGAACTTATTTATGATGCTTGTATTCTTGCTAAGAATGCTAATATGGATGTTTTTAATGCTCTTACTTCTCAAGATA
TACTCTTTTTCTTGATGATCTTAAGTTTGGACCTGGAGATGGATTTCTTAATTTTTATCTTTTTAATTATAGAGCTAAGCCTATT
GGAGACTTAATCTGATAATCTAATGATATTAAGAGAAGATCTAATGTTGGAGTTGTTATGCTTTGA
  
```

B- Comparison of *A. thaliana* codon use between normal (WT) and shuffled (Shu) ScNMT DNA sequences

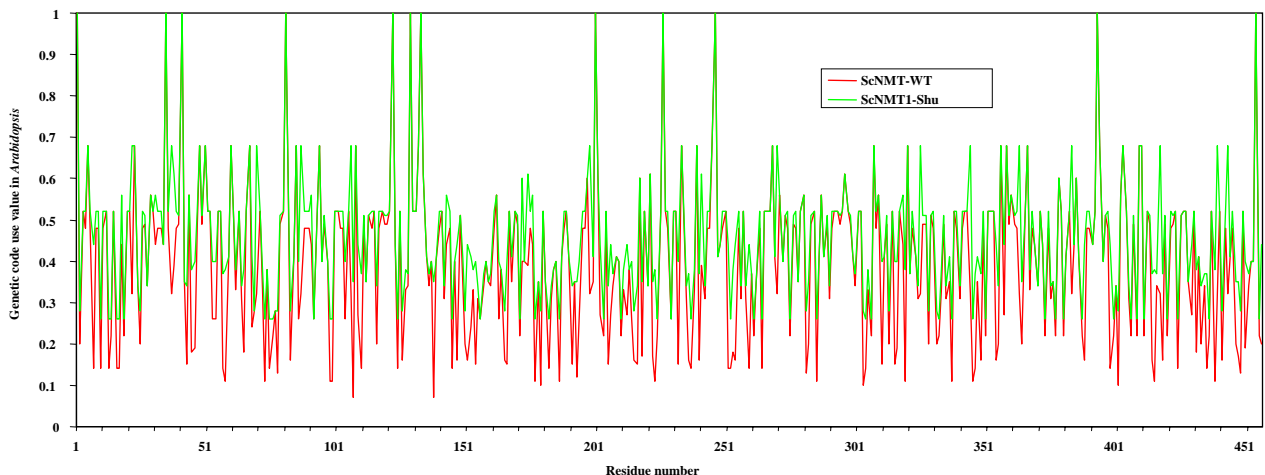

### III- List of oligonucleotide primers used in this study

#### *a- Oligonucleotides used for cloning*

| Oligonucleotide name | Sequence                               | Feature     |
|----------------------|----------------------------------------|-------------|
| NHF2                 | GCCGCCATGGCGGAGGACAGCGAGTCTGCG         | NcoI site   |
| NHF4                 | AGGCTGGCTCCTGCAGTGGCACTGTG             |             |
| NHR1                 | TGTCAGAATTCTAGAAATAAAATCCATCTA         | EcoRI site  |
| NHR2                 | CTTTGGAATGGCAGTTCAGAAATCATTAA          |             |
| NHR3                 | TACCCGTTTCGATATCAACTTCTTATGA           |             |
| N1-Eco               | TTATAGAATTCACAACCTGATTTGATGGTATC       | EcoRI site  |
| N1HF2                | TCAGCCTGTTTAAATGAACTCTTTGCCAGCAGAGAGGA | DraI site   |
| N1HR2                | CGCACTGGTCCC GGTTATTGTAGCACCAGTCCA     | XmaI site   |
| N1ScF1               | CGCACCGATAACAGATCCTTGAATAGAGA          | NcoI site   |
| N1ScF2               | GCCTTTATCTCAGCCATACCGTAACA             |             |
| N1ScF21              | GGAATCTTTTTAAATGTCTGAAGAAGATAA         | DraI site   |
| N1ScR1               | CTATATACGTATCGTCTTTTCAGCCACTACA        | SnaBI site  |
| N1ScR21              | GAGTCCC GGGTCAAAGCATAACA ACTCCAA       | XmaI site   |
| N1ScR2               | TCGTCTCGTAATTTCTTTAATTAGAACAGGT        |             |
| N1R-Xma              | CGACAACCCGGGAAACGTAGCGACCTAGTTCG       | SmaI site   |
| N2+1                 | TGTCAGATCCAAA ACTGAAGCCAGTGGAGG        |             |
| N2HR1                | TGTCAGAATTCTAGAAATAAAATCCATCTA         |             |
| N2-NcoI              | TTGACGATCAACATGGCAGATCCAAA ACT         | NcoI site   |
| N2R-Eco              | GGTTTTAAGAATTCTAAAGAATAAGCCCAAGT       | EcoRI site  |
| N2R-Pml              | GAGGAATCACGTGCTACACATTGGTTTAATG        | PmlI site   |
| N5F3                 | TTCGTTCACTGCATAGTGATGGAATGAAA          |             |
| N5F5                 | CTGGAACCCTAAATCTCGAATCTGGTAA           |             |
| N5F9                 | GAAGGGTCGACCTAGAATCTCTTGGTTACATT       | Sal I site  |
| N5F14                | TCAGAAGAGCTCACTTGTTCTGGAACCCTA         | SacI site   |
| N5F20                | GCGGAACCCGGGCTTGTCTCTTATAA             |             |
| N5R4                 | GTAGCGACCTAGTTCGGCTATAACAGGC           |             |
| N5R8                 | CGCACCGATAACAGATCCTTGAATAGAGA          |             |
| N5R10                | GAACTATGGTTTCCAGCGAAGTATCATCCT         |             |
| N5R13                | GGCCGTAGCTACTTCGTGACCTAAAAATGCA        |             |
| N5R15                | TCTGCCATGGCCTACAAA ACTTAT              | NcoI site   |
| N5R16                | GCGTGTAAGATCTGGATTGGTGCGTGCGAT         | BglII site  |
| N5R21                | GATACCATCAGATCTAGTTGTTGAGCTTATAA       | Bgl II site |
| N5R22                | GTTATCTGCCAAGGCCTACAATTACAAA ACTTATA   | StuI site   |
| PN1R                 | TTTCTACAATTACAAA ACTTATAGAGCTAAG       |             |
| PN1-Xho              | GGGATGACCTCGAGTCTCTTGGTTACATTCTC       | XhoI site   |

***b- Oligonucleotides used for RT- or real-time PCR***

| <b>Gene to be amplified</b> | <b>Oligonucleotide name</b> | <b>Sequence</b>                 |
|-----------------------------|-----------------------------|---------------------------------|
| AlcA-AtNMT1                 | AlcA2                       | AGAGGACGACCTGCAGGTCGACGGA       |
|                             | N5R8                        | CGCACCGATAACAGATCCTTGAATAGAGA   |
| Actin                       | ActF                        | GGTAACATTGTGCTCAGTGGTGG         |
|                             | ActR2                       | TGCCACGACCTTAATCTTCATGCTGCT     |
| AtNMT1                      | N5F2                        | TCCTTCTGTTTACGAGTGGACGACATGT    |
|                             | NR6                         | CTCCAATATGCCAGCTCTGGTAATAACC    |
|                             | N5F5                        | CTGGAACCCTAAATCTCGAATCTGGTAA    |
|                             | N5R10                       | GAACTATGGTTTCCAGCGAAGTATCATCCT  |
| AtNMT2                      | N2F                         | GCACTTCAACCCGAAGCTTTTGACGA      |
|                             | N2R9                        | TTCCAACCTATGGTTCCACCTGAAGTATCAT |
| AtMAP1A                     | 487                         | CTAGAACACCTAAGCTTCCACAC         |
|                             | MAT52                       | ATTCGGTTCAACTTTGGGAGTCCCATC     |
| AtMAP2A                     | MAT69                       | CGCTGAAAAATCAGTTCCTAATGTTAG     |
|                             | MAT55                       | CCTTGGTAACCTCAAAGGTACATGACCCA   |
| AtMAP2B                     | MAT54                       | ATTCCCTACAGGATGCTCTTTGAATTGG    |
|                             | MAT68                       | GTTGAAGGCAACTGTAAATGCACAG       |
| EF                          | EF4                         | GATGATCTGCTGTTGTAACAAGATGGA     |
|                             | EF7                         | ACCCTCAAATCCAGAGATGGGCACAAAT    |
| N1At2 & 35S NMT2            | N2F1                        | CCCAATTGAGCCCGCAACTTTGGTG       |
|                             | NR6                         | CTCCAATATGCCAGCTCTGGTAATAACC    |
| HsNMT1                      | N1HF3                       | GACATTCCAGTAGTGCACCAGCTCCTCA    |
|                             | N1HR3                       | GGAAATCTGTCACCTCTCCGTTTGC GTTCT |
| HsNMT2                      | NHF4                        | AGGCTGGCTCCTGCAGTGGCACTGTG      |
|                             | NHR3                        | TACCCGTTTCGATATCAACTTCTTATGA    |
| PR1                         | F                           | GGAGCTACGCAGAACA ACTAAGA        |
|                             | R                           | CCCACGAGGATCATAGTTGCAACTGA      |
| ScNMT1                      | N1ScF2                      | GCCTTTATCTCAGCCATACCGTAACA      |
|                             | N1ScR2                      | TCGTCTCGTAATTTCTTTAATTAGAACAGGT |

***b- Oligonucleotides used for RT- or real-time PCR (following)***

| <b>Gene to be amplified</b> | <b>Oligonucleotide name</b> | <b>Sequence</b>                        |
|-----------------------------|-----------------------------|----------------------------------------|
| AKIN $\beta$ 1              | 1K1F4                       | ACTGGCGGTGCCACCTCAGCTTCAT              |
|                             | K1R6                        | TACTATGGATTGAGGAGTCCATCCTTGCTCT        |
| AKIN $\beta$ 2              | K2F1                        | TAACCATGTGCTCCTCCTGAGCTTATGGGT         |
|                             | K2R1                        | GAAGGATTAGGGATATGAATTCATCAGGTCTTTGAAGT |
| AKIN $\beta$ 3              | K3F2                        | CTATATCGAGAACCGAGACGCCCAAGA            |
|                             | K3R2                        | GCTCCCTCTTCTTTGGACAGGCTT               |

***c- Oligonucleotides used for AKIN $\beta$ 1: and AKIN $\beta$ 2:GFP fusions***

| <b>Oligonucleotide name</b> | <b>Sequence</b>              | <b>Feature</b>              |
|-----------------------------|------------------------------|-----------------------------|
| AK1F                        | TGCATCTAGATGGGAAATGCGAACGGCA | XbaI site                   |
| AK1FG <sub>2</sub> A        | TGCATCTAGATGGCAAATGCGAACGGCA | XbaI site, G <sub>2</sub> A |
| AK1RM                       | ACGTGGATCCGTTTCTGCAGCTTCTT   | BamHI site                  |
| AK2F                        | TGCATCTAGATGGGTAACGTGAACGCGA | XbaI site                   |
| AK2FG <sub>2</sub> A        | TGCATCTAGATGGCTAACGTGAACGCGA | XbaI site, G <sub>2</sub> A |
| AK2RM                       | ACGTAGATCTGCAGCCGACTTCTTGT   | BglII site                  |
